# Supplementary material for: Peroxisome inspired hybrid enzyme nanogels for chemodynamic and photodynamic therapy
Source: PubMed Central journal article supplement (PMC8413279; doi:10.1038/s41467-021-25561-z), 2021-09-02
Supplement: 41467_2021_25561_MOESM1_ESM.pdf [file 41467_2021_25561_MOESM1_ESM.pdf]

# **Peroxisome inspired hybrid enzyme nanogels for chemodynamic and photodynamic therapy**

Qin et al

## **List of supplementary figures and tables**

Supplementary Figure 1. Schematic diagram of enzymatic manipulation in the extracellular lactate: pyruvate ratio.

Supplementary Figure 2. TEM and SEM images of the Fe<sub>3</sub>O<sub>4</sub>@IHPs and FIGs.

Supplementary Figure 3. Digital photographs of the synthesized macro-hydrogel.

Supplementary Figure 4. The particle distribution under Brownian motion measured by NTA.

Supplementary Figure 5. Variations of Zeta potentials in the synthesis process of FIGs-LC.

Supplementary Figure 6. Enzymatic activity under different pH values and the storage activity.

Supplementary Figure 7. The cumulative release of enzyme of FIGs-LC.

Supplementary Figure 8. Stability of free ICG and FIGs-LC.

Supplementary Figure 9. UV-Vis-NIR absorption spectra of ICG and FIGs-LC.

Supplementary Figure 10. TEM images of the degradation of FIGs-LC.

Supplementary Figure 11. GSH-responsive size changes of FIGs-LC.

Supplementary Figure 12. The standard concentration-absorbance curve of Fe<sup>2+</sup> solutions.

Supplementary Figure 13. The Fe<sup>2+</sup> release under normal physiological conditions.

Supplementary Figure 14. The MB degradation curve under normal physiological conditions.

Supplementary Figure 15. O<sub>2</sub> nanobubble distributions under Brownian motion in different solutions.

Supplementary Figure 16. High density of O<sub>2</sub> in the micro/nanobubbles by STXM imaging.

Supplementary Figure 17. Temperature elevation of FIGs-LC solutions under laser irradiation.

Supplementary Figure 18. The standard concentration-absorbance curve of MB solutions.

Supplementary Figure 19. Fluorescence emission spectrum of FRGs-LC.

Supplementary Figure 20. Flow cytometry analysis of SMMC-7721 after incubation with FRGs-LC.

Supplementary Figure 21. CLSM images of cellular uptake of SMMC-7721 cancer cells incubated with FRGs-LC.

Supplementary Figure 22. Analysis of intracellular NADH and NAD<sup>+</sup>.

Supplementary Figure 23. The cell apoptosis after co-incubation with IGs and IGs-LC

Supplementary Figure 24. Confocal images of the intracellular O<sub>2</sub> level.

Supplementary Figure 25. CLSM images for intracellular ROS detection.

Supplementary Figure 26. The cytotoxicity of FIGs-L co-incubation with normal cells and cancer cells.

Supplementary Figure 27. Gating strategy to analyze the apoptosis of cells in Fig. 5h-k.

Supplementary Figure 28. In vivo and ex vivo fluorescence images of tumor-bearing mice at different time after intravenous injection of ICG or FIGs-LC.

Supplementary Figure 29. The semi-quantitative fluorescence of ROS indicator in tumors after co-injected with different solutions.

Supplementary Figure 30. IR thermal imaging of mice during the therapy process.

Supplementary Figure 31. H&E staining images of the major organs (heart, liver, spleen, lung, and kidney).

Supplementary Figure 32. Pharmacokinetics of FRGs-LC.

Supplementary Figure 33. Blood biochemistry assays.

Supplementary Table 1. The loading efficiency and loading amount of LOx and CAT.

Supplementary Table 2. Hematology analysis of mice with FIGs-LC administration.

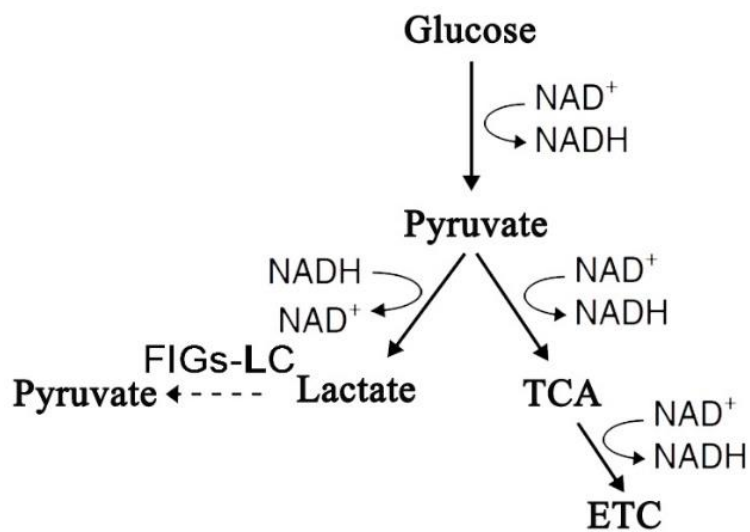

**Supplementary Figure 1.** Schematic diagram of enzymatic manipulation in the extracellular lactate: pyruvate ratio to impact the cytoplasmic  $\text{NADH}:\text{NAD}^+$  ratio by FIGs-LC (TCA cycle: tricarboxylic acid cycle, ETC: electron transport chain).

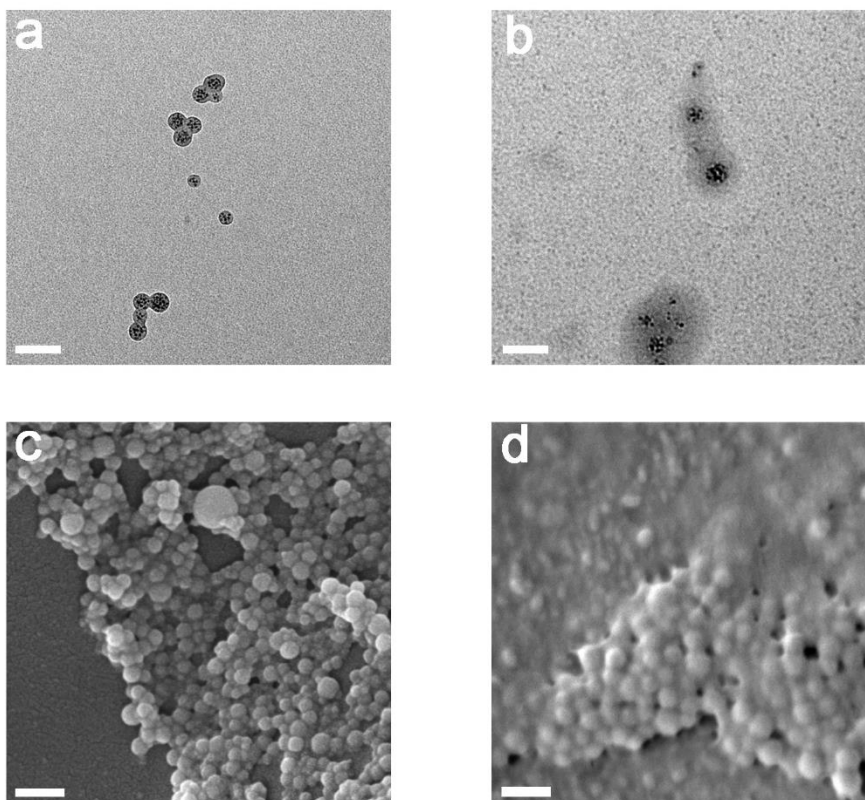

**Supplementary Figure 2.** TEM images of the  $\text{Fe}_3\text{O}_4@\text{IHPs}$  (a) and FIGs (b) and SEM images of the  $\text{Fe}_3\text{O}_4@\text{IHPs}$  (c) and FIGs (d), scale bar: 100 nm.

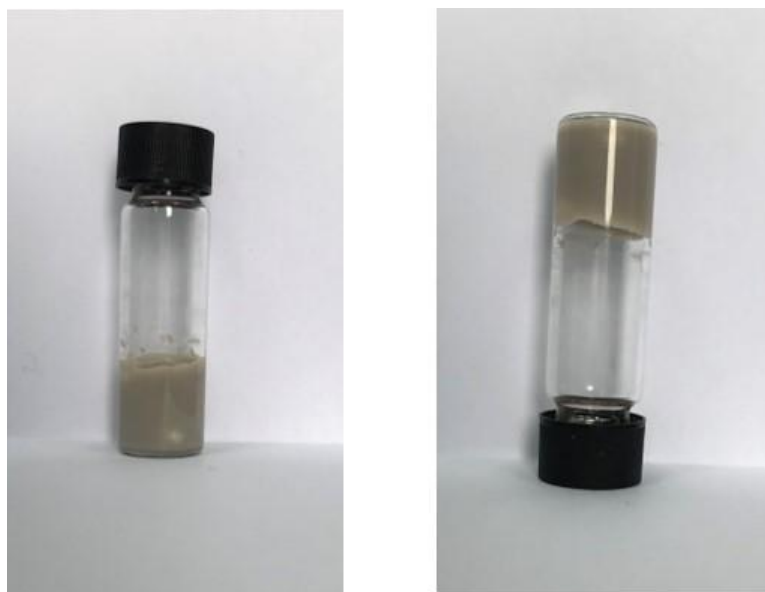

**Supplementary Figure 3.** The formation of the macro-hydrogel containing  $\text{Fe}_3\text{O}_4@\text{IHPs}$  after increasing the feeding amount of AP and Fmoc-Tyr ( $\text{H}_2\text{PO}_3$ )-OH.

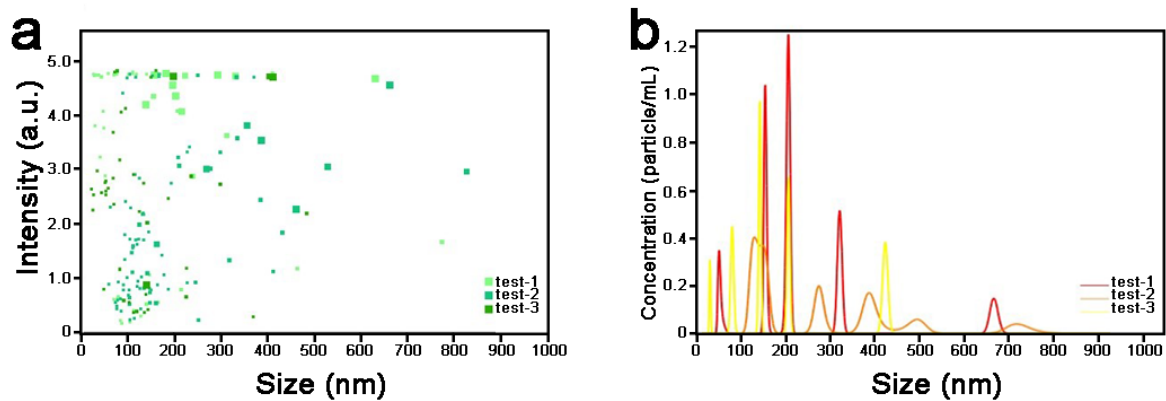

**Supplementary Figure 4.** The image of particle distribution (**a**) under Brownian motion and the corresponding size distribution (**b**) of FIGs-LC tested by the NanoSight technology analysis (NTA). Test-1, test-2, and test-3 represent three independent replicates.

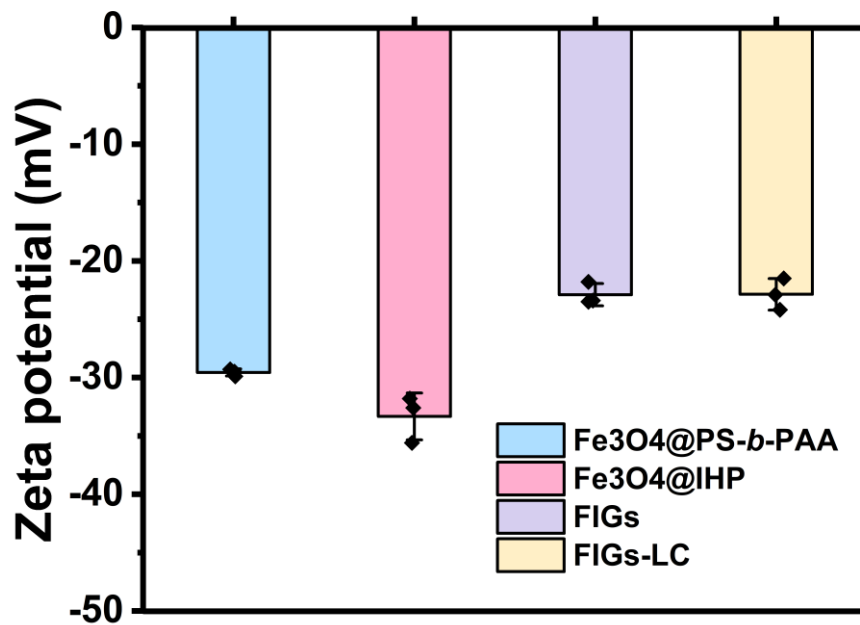

**Supplementary Figure 5.** Zeta potentials of Fe<sub>3</sub>O<sub>4</sub>@PS-*b*-PAA, Fe<sub>3</sub>O<sub>4</sub>@IHPs, FIGs, and FIGs-LC, respectively. Data are presented as mean values  $\pm$  s.d. ( $n = 3$ ).

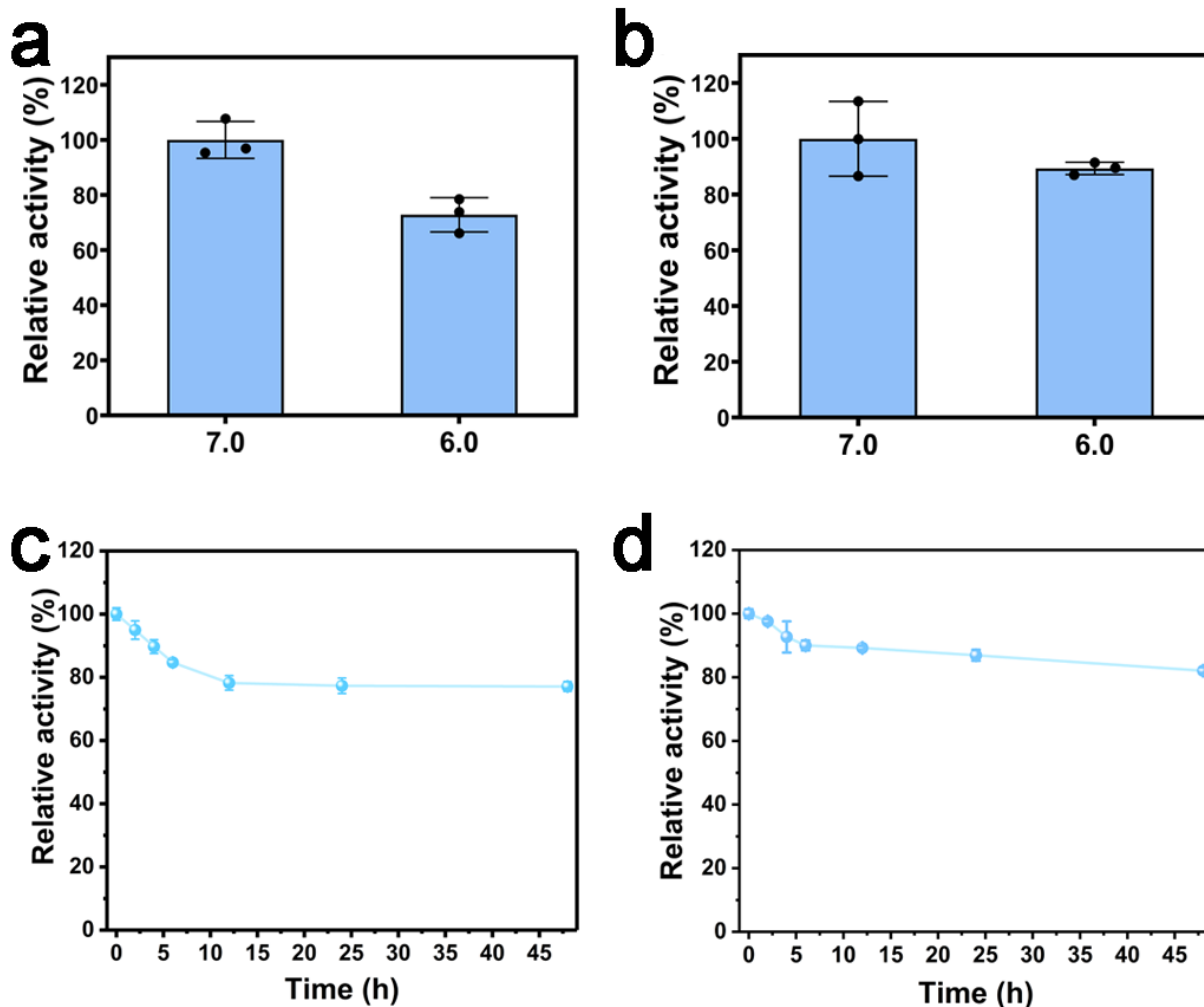

**Supplementary Figure 6.** **a** LOx activity of FIGs-L (without catalase) in the simulated TME (containing 100  $\mu$ M of  $H_2O_2$ , 10 mM of GSH, and 2 mM of lactate) with different pH values. **b** CAT activity of FIGs-LC in the simulated TME with different pH values. **c** Storage activity of LOx in FIGs-LC at room temperature for 48 hours. **d** Storage activity of CAT in FIGs-LC at room temperature for 48 hours. Data are presented as mean values  $\pm$  s.d. ( $n = 3$ ).

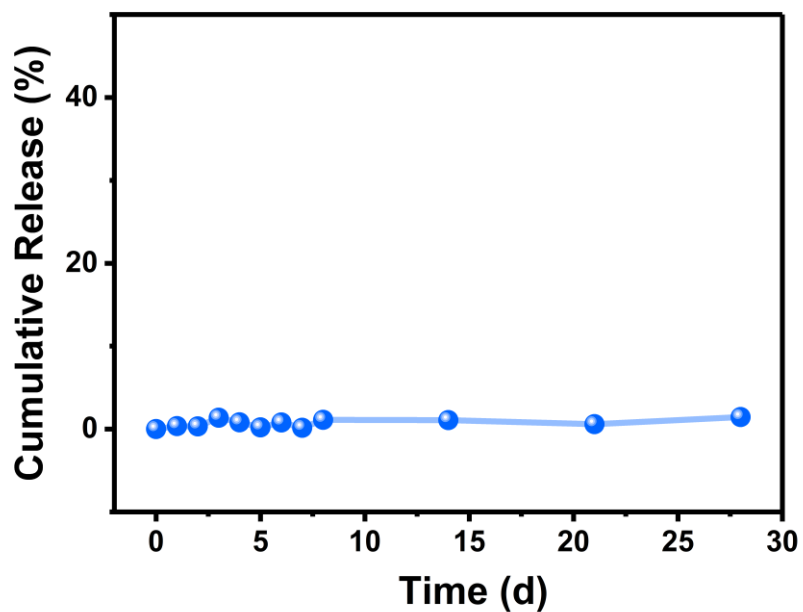

Supplementary Figure 7. The cumulative release of the enzymes in FIGs-LC in PBS at 37 °C.

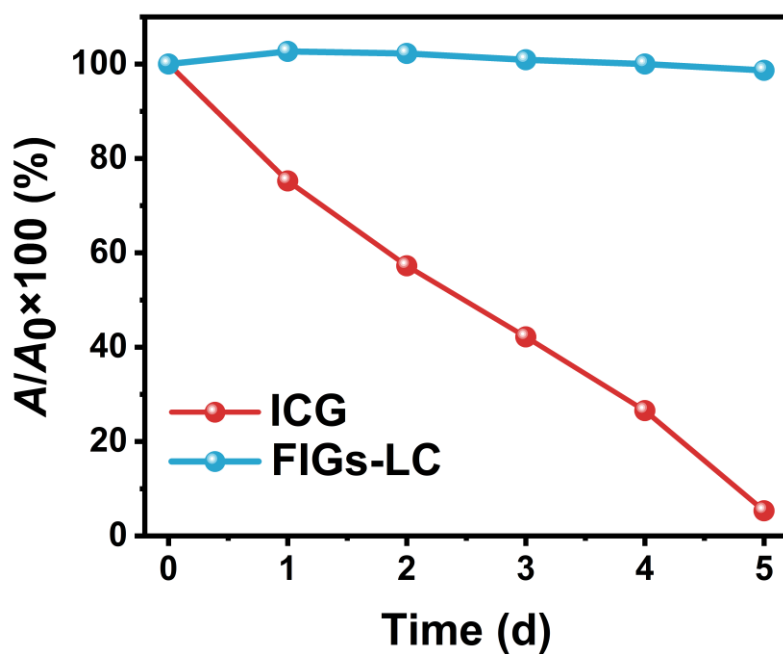

Supplementary Figure 8. Stability of free ICG and FIGs-LC in deionized water, reflected by the absorbance at 780 nm in UV-Vis-NIR absorption spectra.

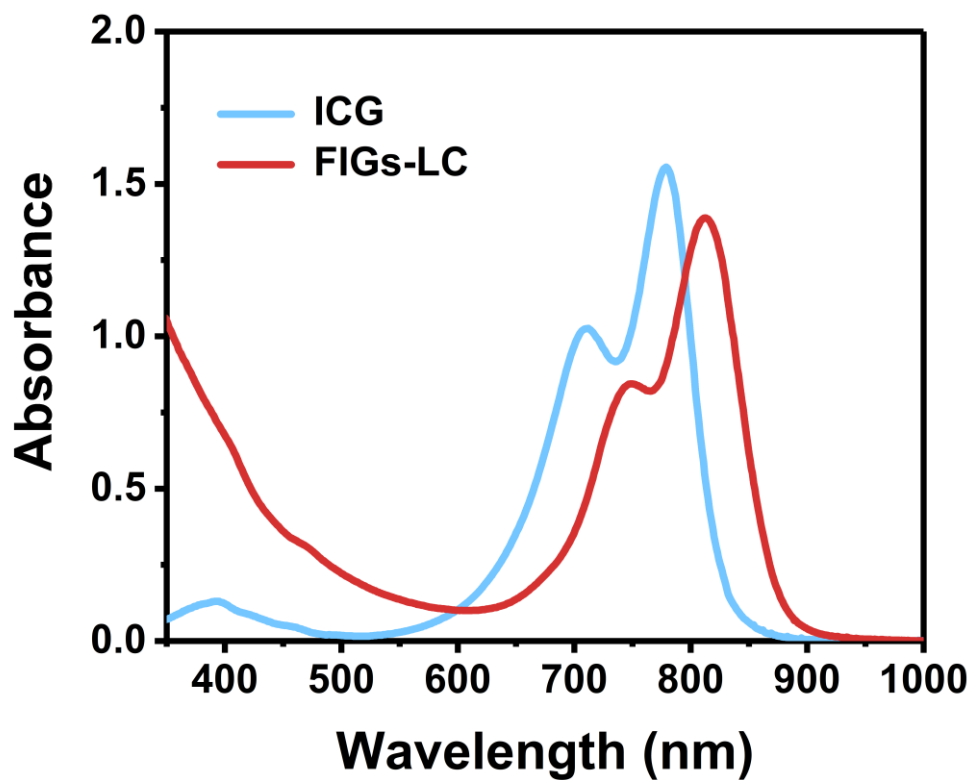

**Supplementary Figure 9.** UV-Vis-NIR absorption spectra of ICG and FIGs-LC.

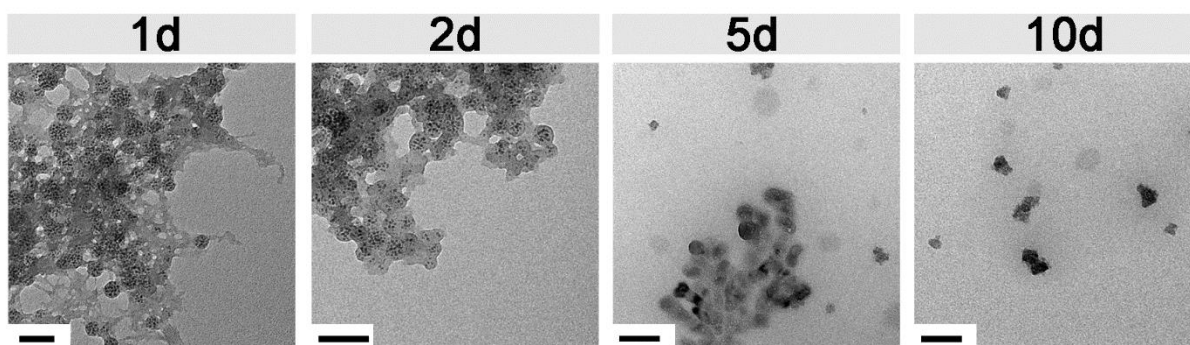

**Supplementary Figure 10.** TEM images of FIGs-LC after incubated in PBS (containing 10 mM GSH and 100  $\mu$ M  $H_2O_2$  and 2 mM lactate, pH 6.0) for 1 d, 2 d, 5 d, and 10 d. Scale bar:100 nm.



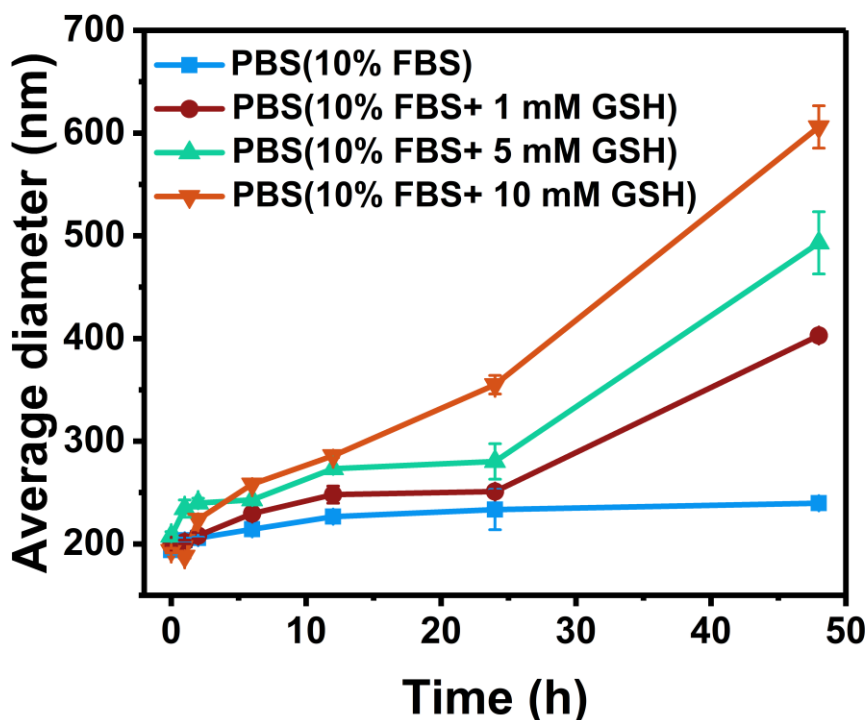

**Supplementary Figure 11.** Size changes (by Intensity) of FIGs-LC in PBS with different GSH concentrations. Data are presented as mean values  $\pm$  s.d. ( $n = 3$ ).

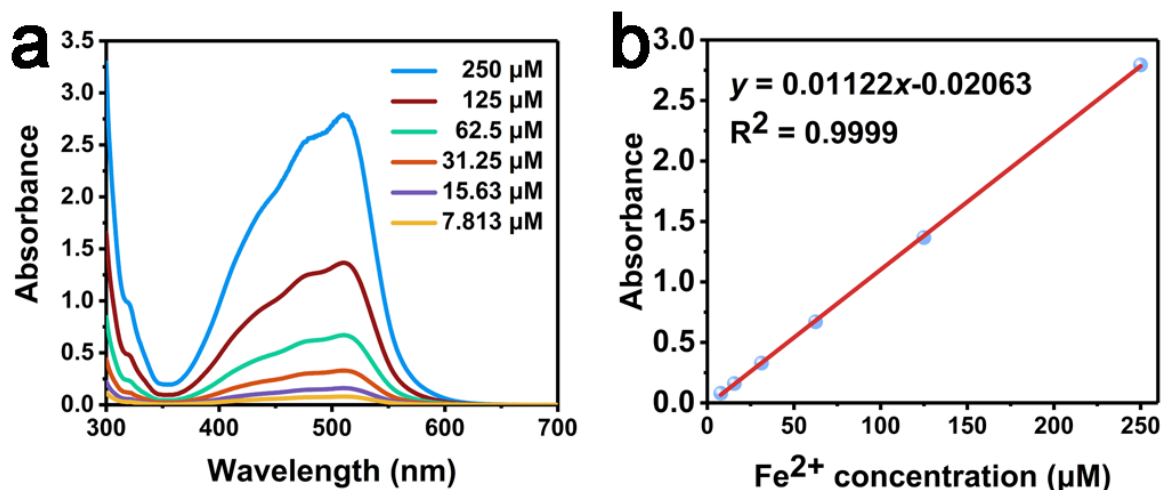

**Supplementary Figure 12.** The quantification of  $\text{Fe}^{2+}$  by using 1,10-phenanthroline monohydrate. (a) The UV-Vis spectra of  $\text{Fe}^{2+}$  solutions with different concentrations (7.813  $\mu\text{M}$ , 15.63  $\mu\text{M}$ , 31.25  $\mu\text{M}$ , 62.50  $\mu\text{M}$ , 125.00  $\mu\text{M}$ , 250.00  $\mu\text{M}$ ) after adding 1,10-phenanthroline monohydrate. (b) The standard curve of  $\text{Fe}^{2+}$  for absorbance value at 510 nm.  $y = 0.01122x - 0.02063$ ,  $R^2 = 0.9999$ .

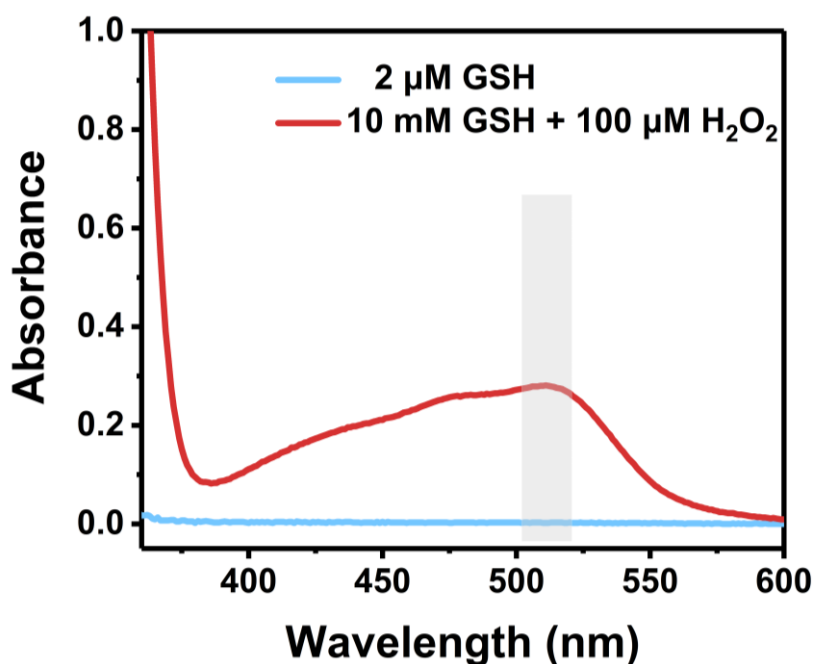

**Supplementary Figure 13.** The Fe<sup>2+</sup> release under the simulated normal physiological conditions (2 μM GSH) and tumoral conditions (10 mM GSH and 100 μM H<sub>2</sub>O<sub>2</sub>), after incubation for 72 h, none of detectable Fe<sup>2+</sup> was observed by the absorbance at 510 nm in the UV-Vis spectrum.

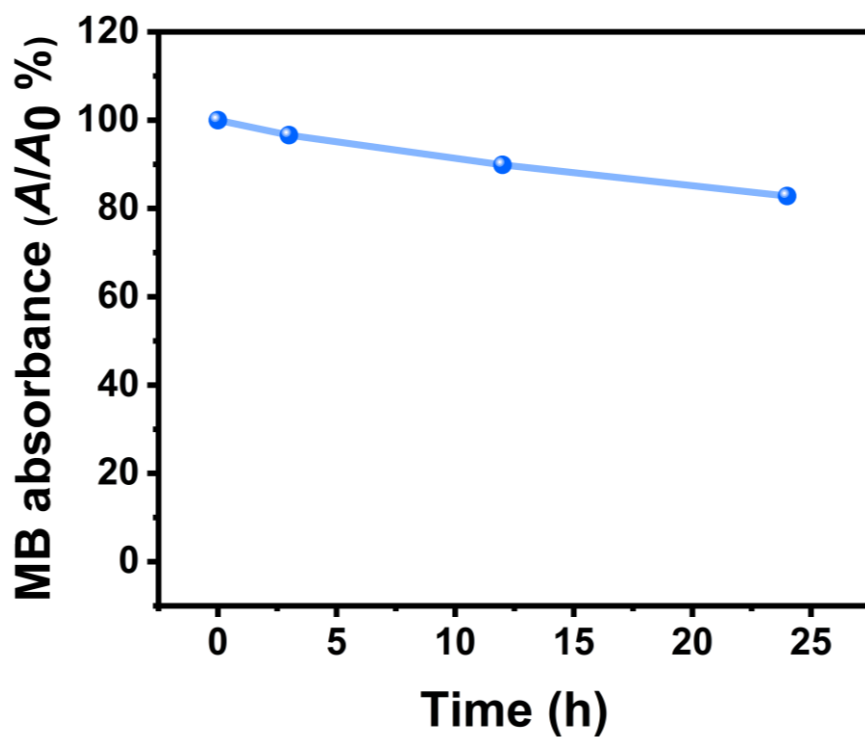

**Supplementary Figure 14.** The MB degradation curve under the simulated normal physiological conditions.

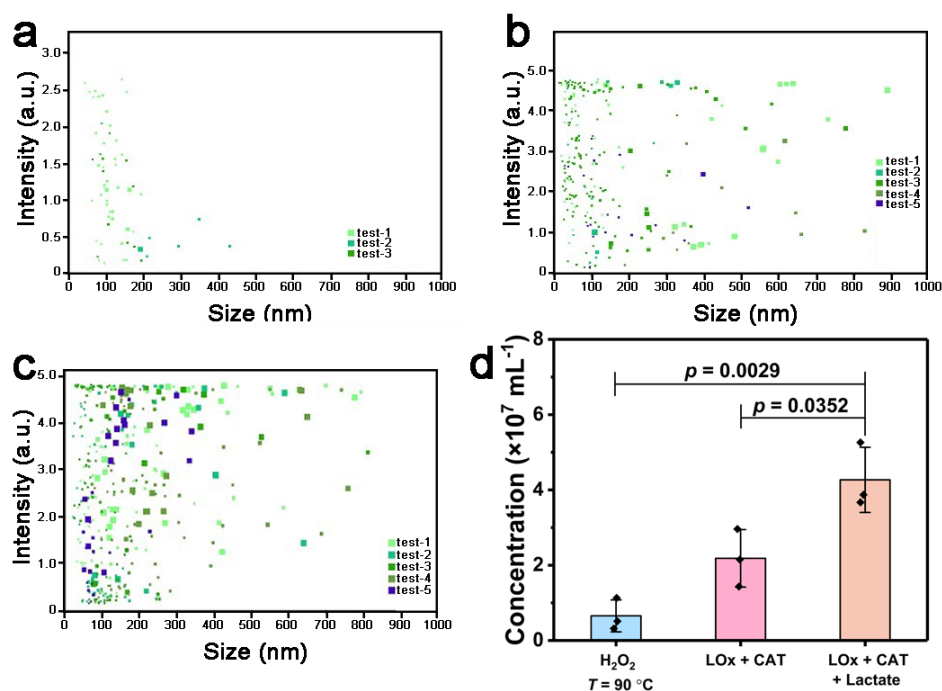

**Supplementary Figure 15.** Images of particle distribution under Brownian motion in different solutions, **(a)**:  $\text{H}_2\text{O}_2$  (100  $\mu\text{M}$  in PBS,  $\text{pH}=6$ ,  $T=90$   $^\circ\text{C}$ ), **(b)**: LOx-CAT (PBS,  $\text{pH}=6$ ), and **(c)**: LOx-CAT (PBS containing 100  $\mu\text{M}$  lactate,  $\text{pH}=6$ ). **(d)** The corresponding total nanoparticle concentrations. In **a**, **b**, **c**, the legends represent different replicates. Data represent mean  $\pm$  s.d. from three independent replicates,  $p$  values were analyzed by Student's two-sided  $t$ -test.

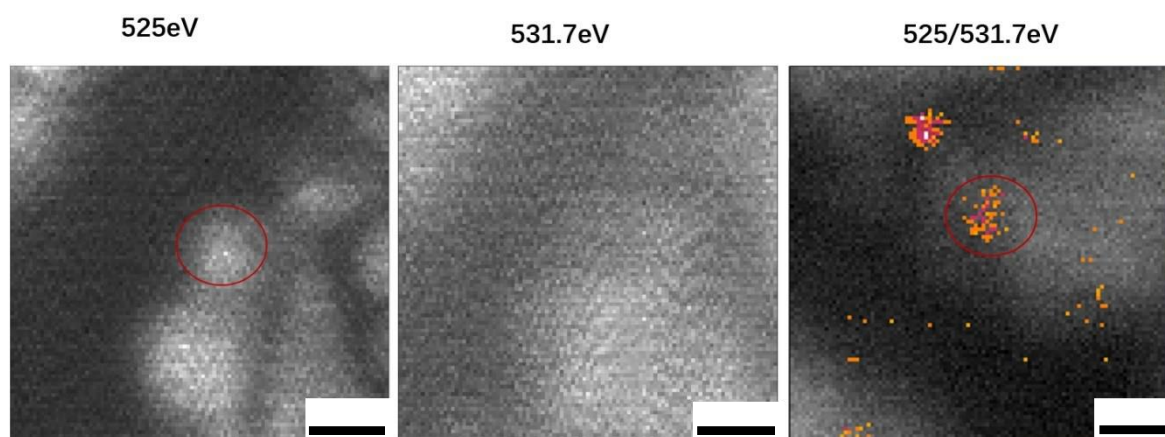

**Supplementary Figure 16.** High density of  $\text{O}_2$  in the micro/nanobubbles: STXM transmission images of multiple micro/nanobubble at photon energies of 525 eV and 531.7 eV, as water barely absorbs soft X-rays below 535 eV (Shanghai Synchrotron Radiation Facility, Shanghai Institute of Applied Physics, Chinese Academy of Sciences). Scale bar: 2  $\mu\text{m}$

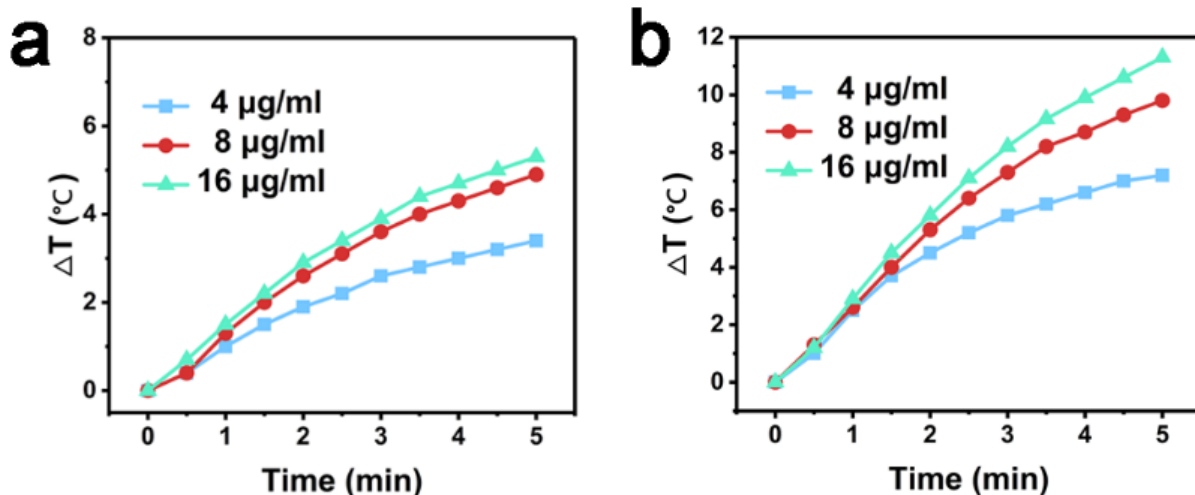

**Supplementary Figure 17.** Temperature elevation of FIGs-LC solutions with different ICG concentration under irradiation of an 808 nm light with the power of 0.25 W (a) and 0.5 W (b).

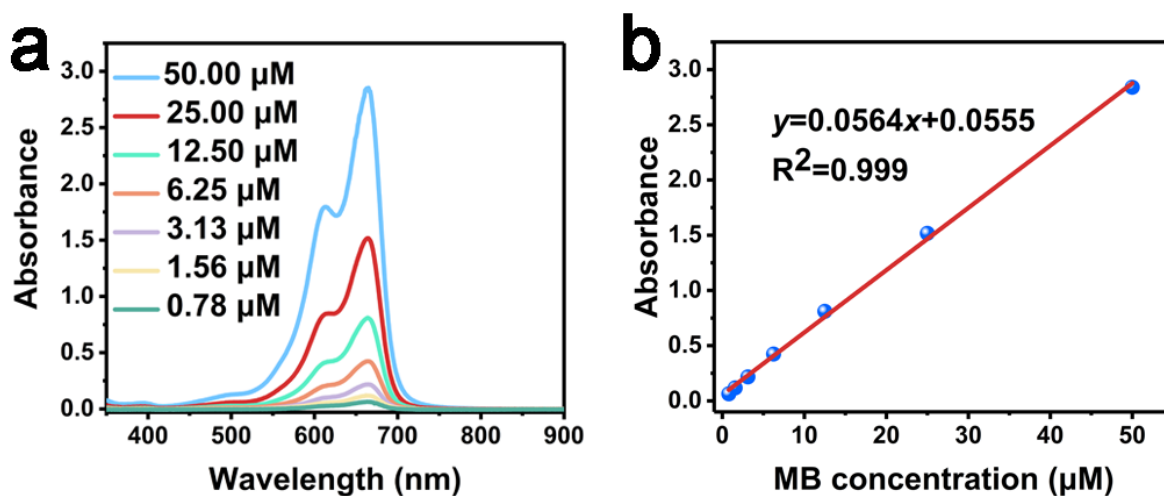

**Supplementary Figure 18.** (a) The UV-Vis spectra of MB solutions with different concentrations (0.78  $\mu\text{M}$ , 1.56  $\mu\text{M}$ , 3.13  $\mu\text{M}$ , 6.25  $\mu\text{M}$ , 12.50  $\mu\text{M}$ , 25.00  $\mu\text{M}$ , and 50.00  $\mu\text{M}$ ). (b) The standard concentration-absorbance curves of MB for absorbance value at 664 nm.  $y = 0.0564x + 0.0555$ ,  $R^2 = 0.999$ .

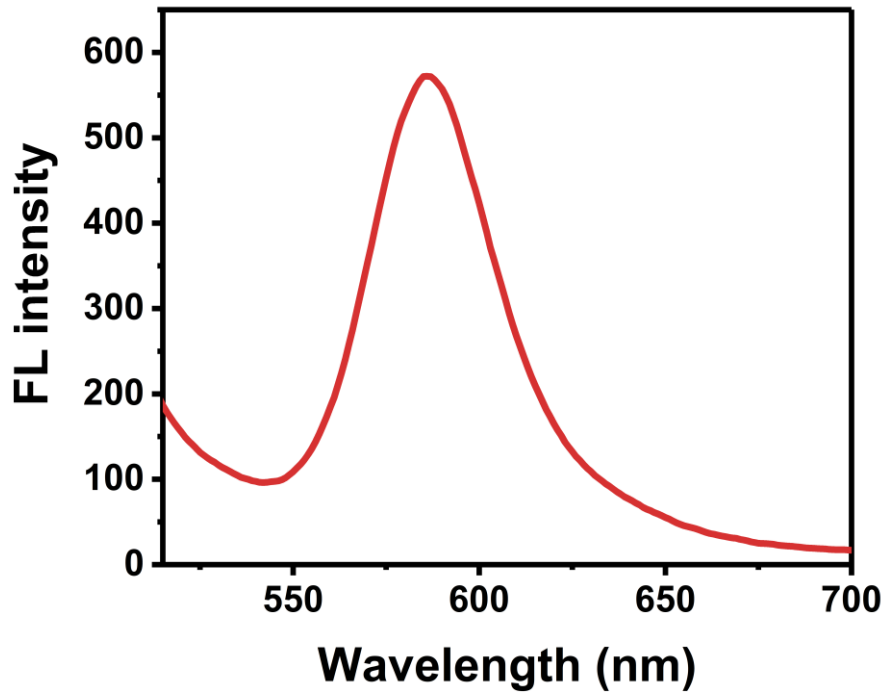

**Supplementary Figure 19.** Fluorescence emission spectrum of FRGs-LC, the characteristic peak at 585 nm is derived from Rhodamine B.

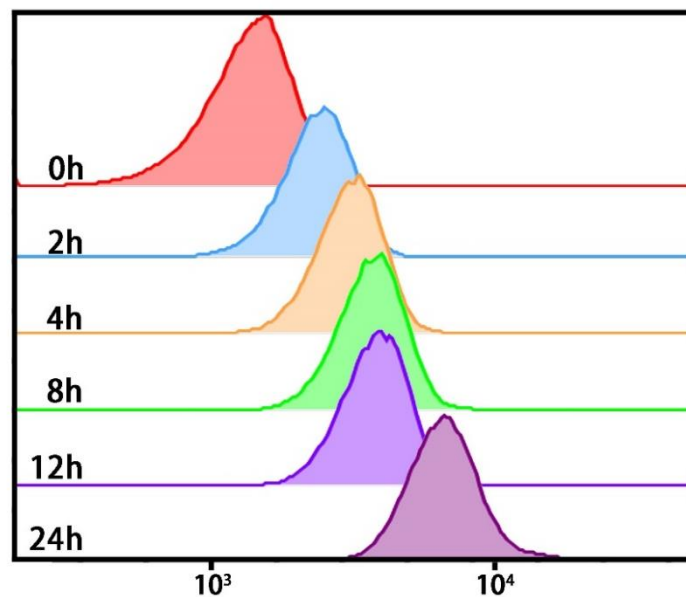

**Supplementary Figure 20.** Flow cytometry analysis of SMMC-7721 after incubation with FRGs-LC over different time.

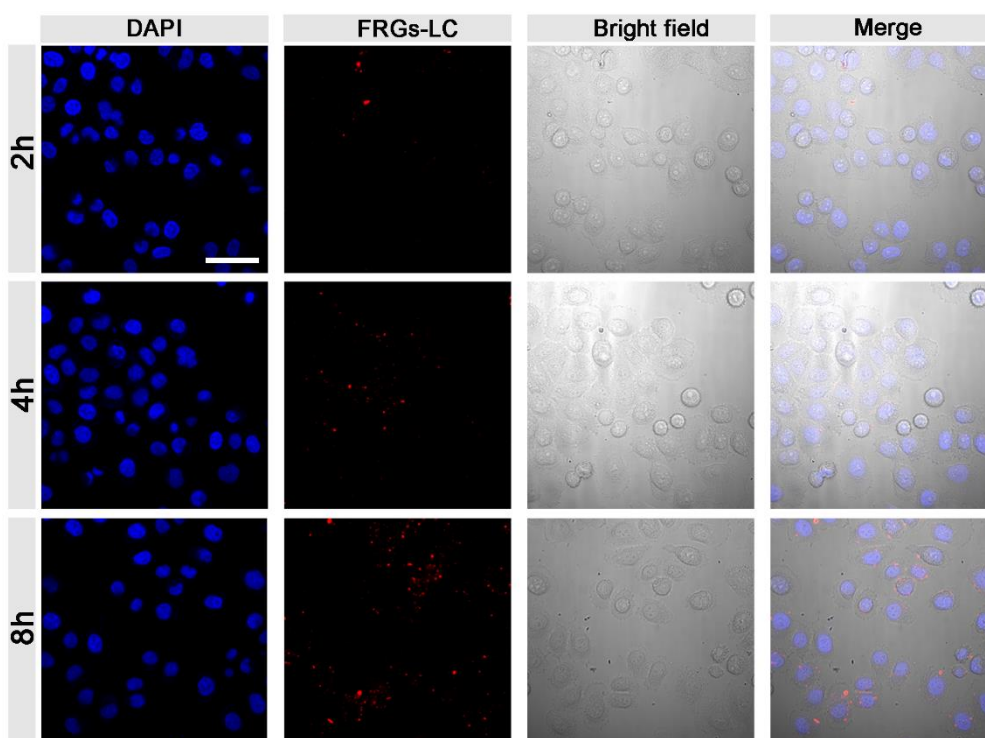

**Supplementary Figure 21.** CLSM images of intracellular Rhodamine B (RhB) for SMMC-7721 cancer cells incubated with FRGs-LC for 2 h, 4 h, and 8 h. Scale bar: 50  $\mu\text{m}$ .

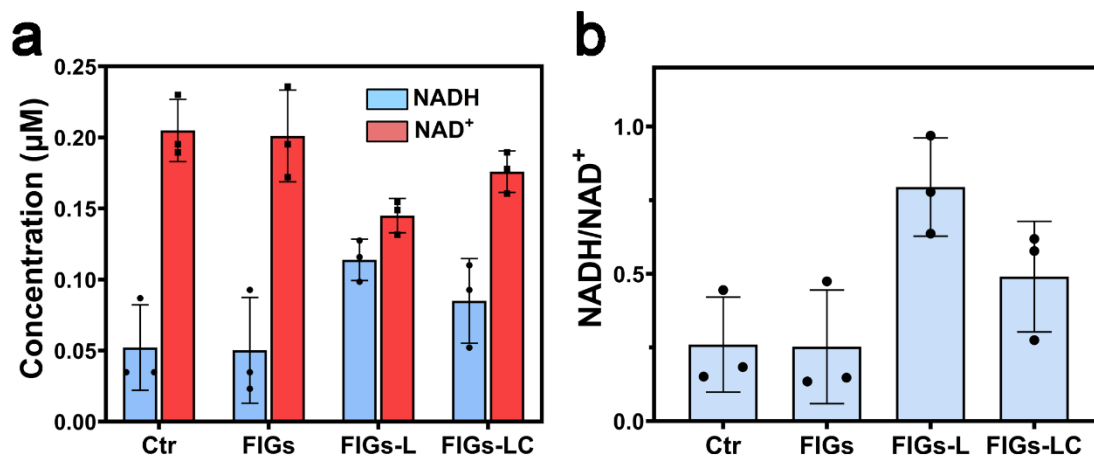

**Supplementary Figure 22.** Concentration of intracellular NADH and NAD<sup>+</sup> (a) and the NADH/NAD<sup>+</sup> redox ratio (b) of cells after co-incubation with FIGs, FIGs-L and FIGs-LC. Data represent mean  $\pm$  s.d. from three independent replicates.

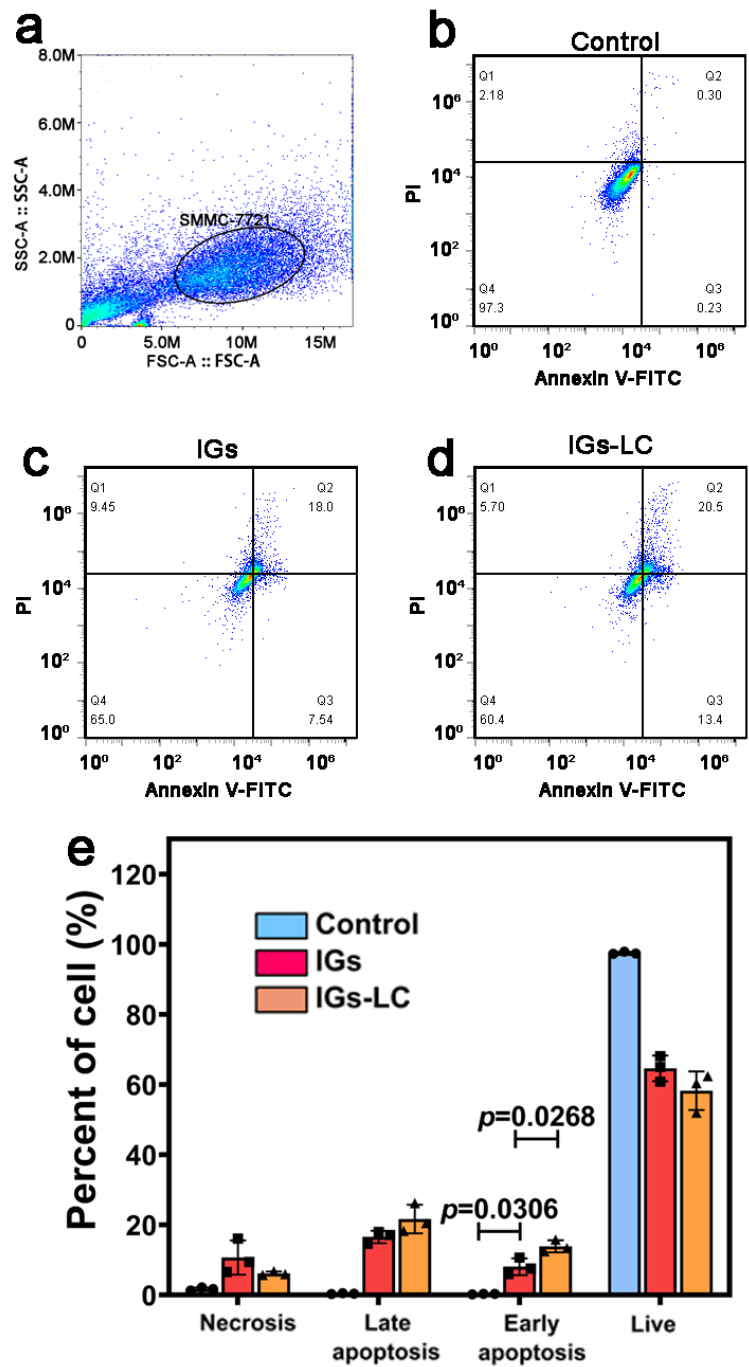

**Supplementary Figure 23.** **a** Gating strategy to analyze the apoptosis of cells. The apoptosis analysis of cells after co-incubation with: PBS (**b**, control), IGs (**c**) and IGs-LC (**d**). **e** Percent of cells in different stages (Necrosis, late apoptosis, early apoptosis, and live), data represent mean  $\pm$  s.d. from three independent replicates,  $p$  values were analyzed by Student's two-sided  $t$ -test.

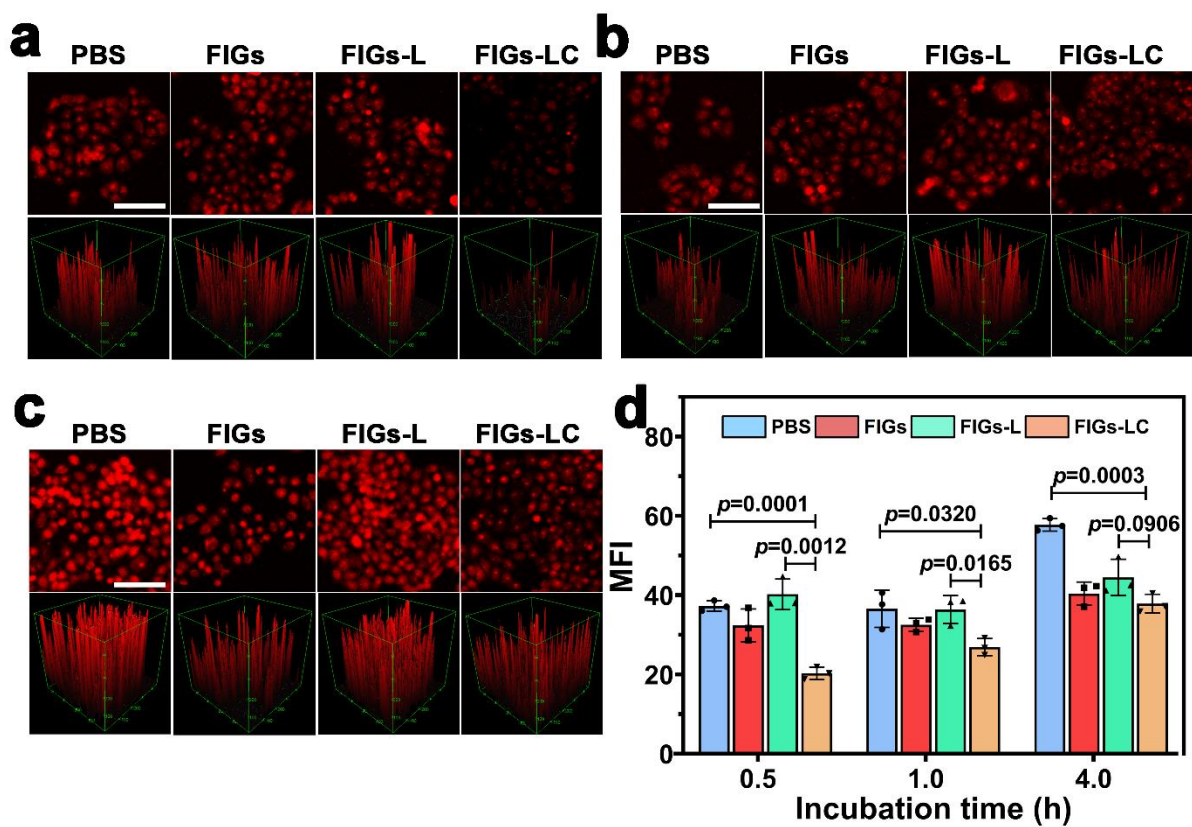

**Supplementary Figure 24.** Confocal images and corresponding surface plot images of the intracellular  $O_2$  level indicator Ru(dpp)-stained SMMC-7721 cells after co-incubated with different solutions (PBS, FIGs, FIGs-L, FIGs-LC) for 0.5 h (**a**), 1.0 h (**b**), and 4.0 h (**c**) in hypoxic condition, scale bar: 100  $\mu$ m. **d** The corresponding mean fluorescence intensity of Ru(dpp), data represent mean  $\pm$  s.d. from three independent replicates,  $p$  values were analyzed by Student's two-sided  $t$ -test.



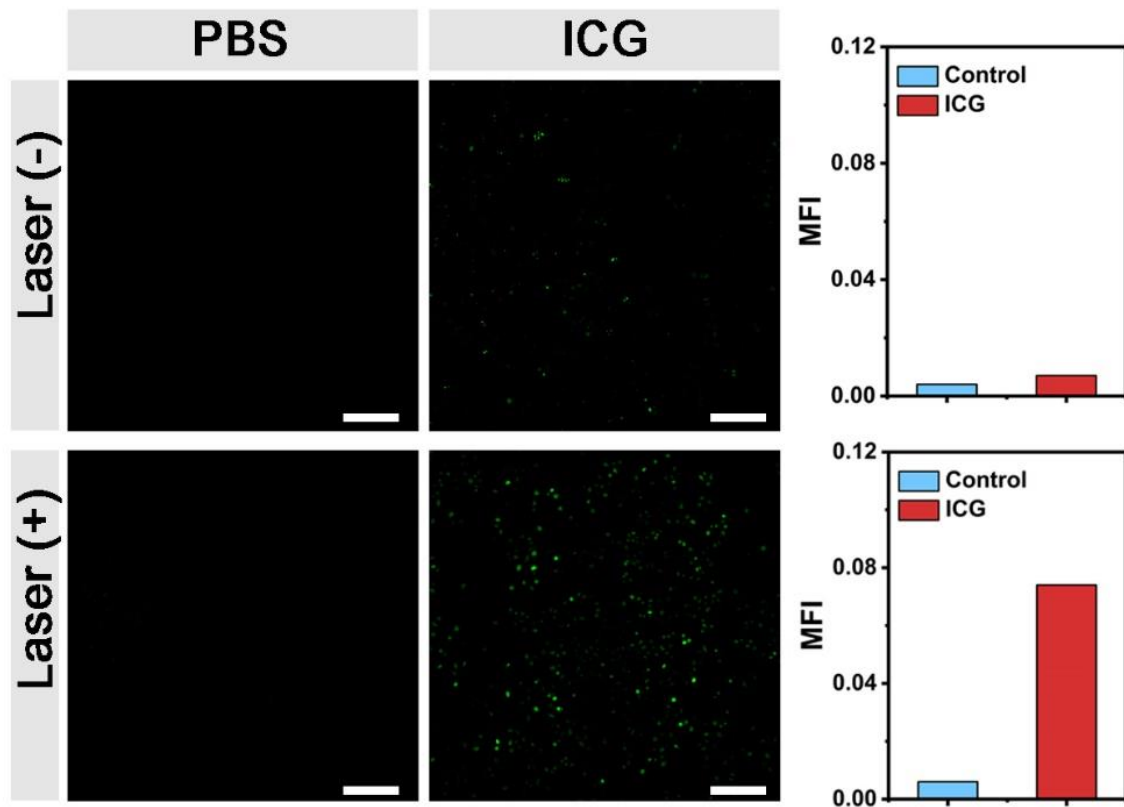

**Supplementary Figure 25.** CLSM images of SMMC-7721 cells treated with PBS and ICG for 12 h with DCFH-DA as a ROS detector, Scale bar: 200 μm. And the corresponding mean fluorescence intensity (MFI) of DCF fluorescence for ROS in cancer cells without laser irradiation, the data were analyzed by Image J.

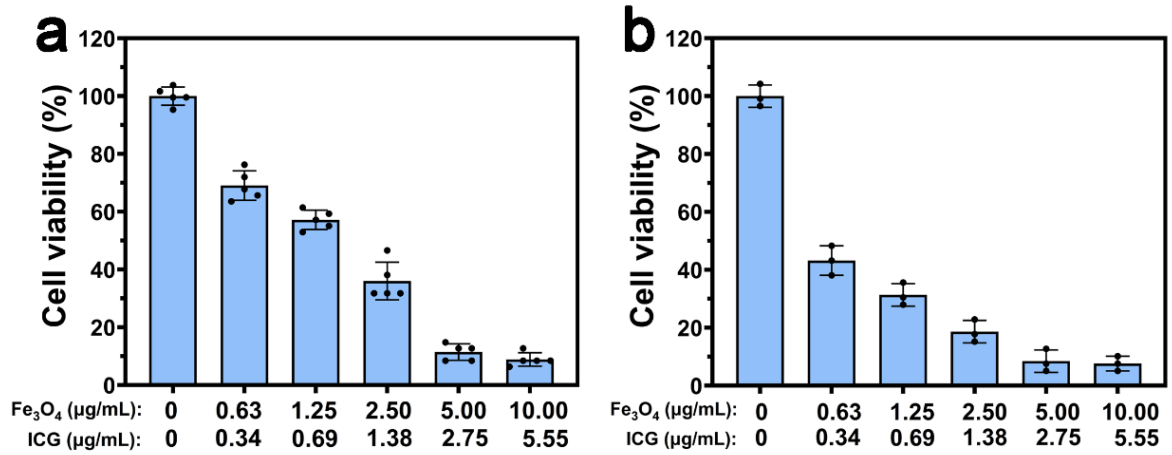

**Supplementary Figure 26.** The cytotoxicity of FIGs-L after the co-incubation with normal cells (3T3 cells) (**a**, lactate concentration: 0.5 mM,  $n=5$ ) and tumor cells (SMMC-7721 cells) (**b**, lactate concentration: 2.0 mM,  $n=3$ ). Data represent means  $\pm$  s.d.

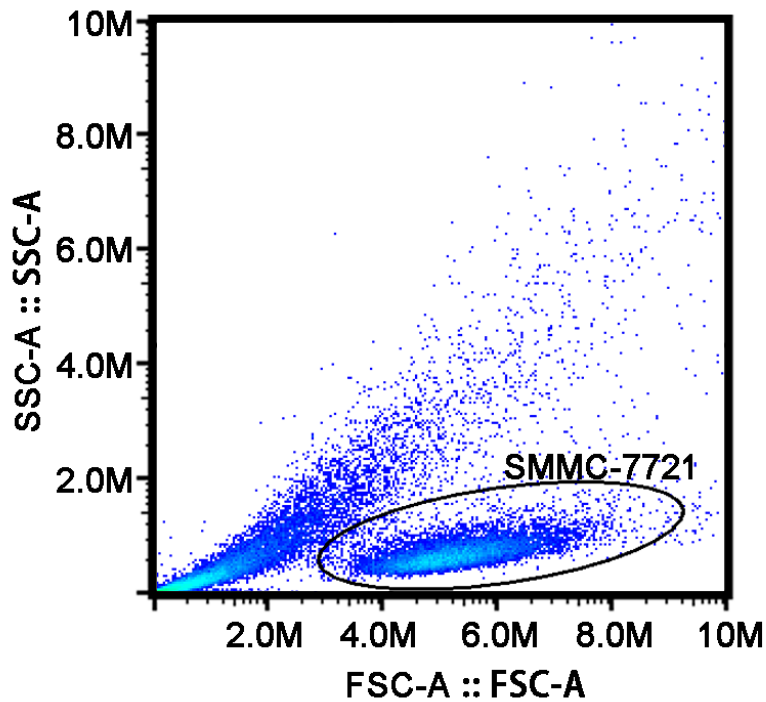

**Supplementary Figure 27.** Gating strategy to analyze the apoptosis of cells in Fig. 5h-k.

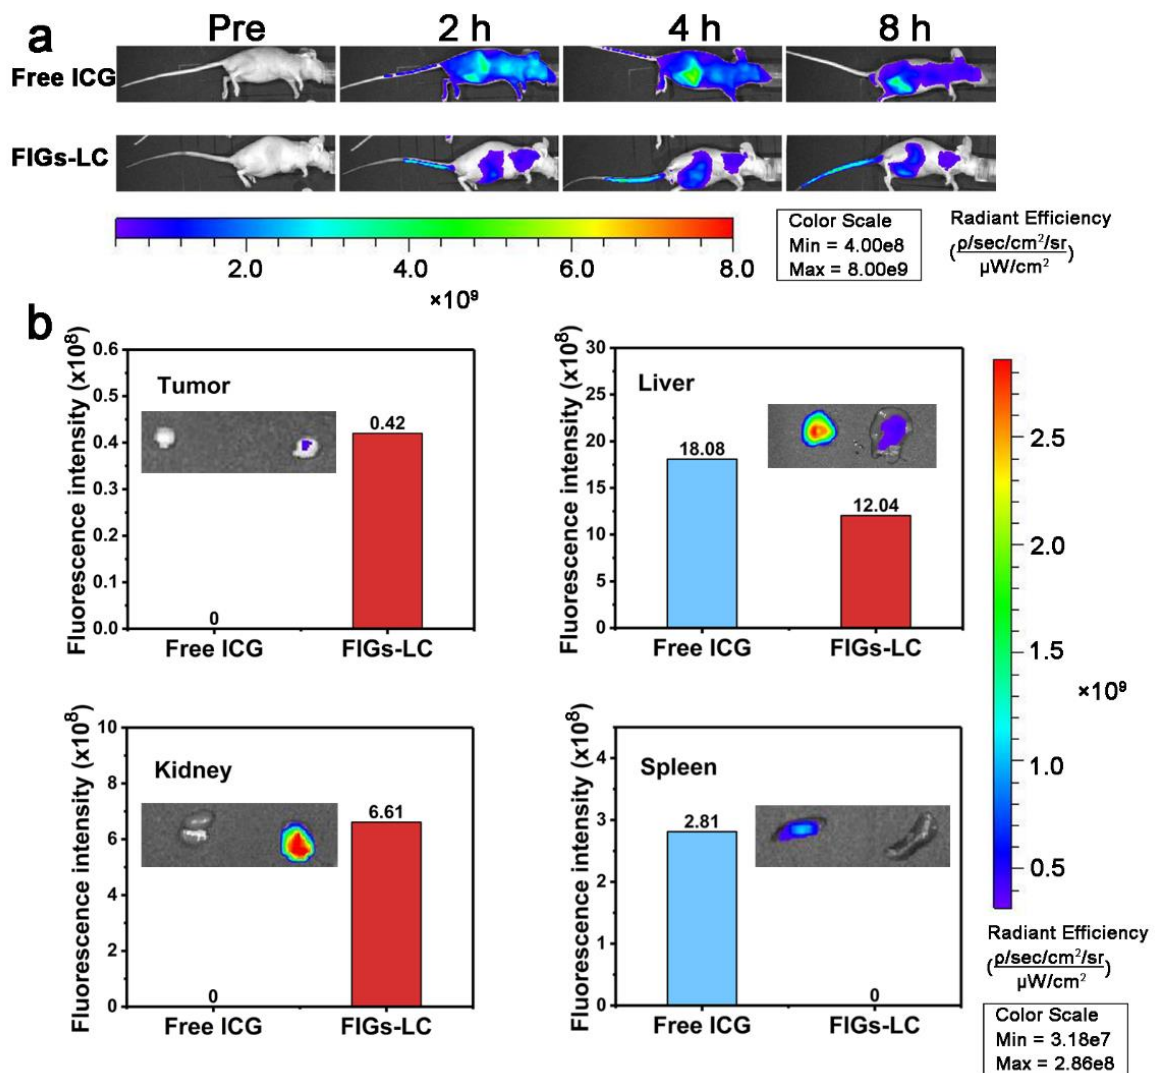

**Supplementary Figure 28.** (a) In vivo fluorescence images of tumor-bearing mice at 0 h, 2 h, 4 h, and 8 h after intravenous injection of ICG or FIGs-LC. (b) Ex vivo fluorescence images and the semiquantitative analyses of tumors and organs of mice with intravenous injection of free ICG or FIGs-LC.

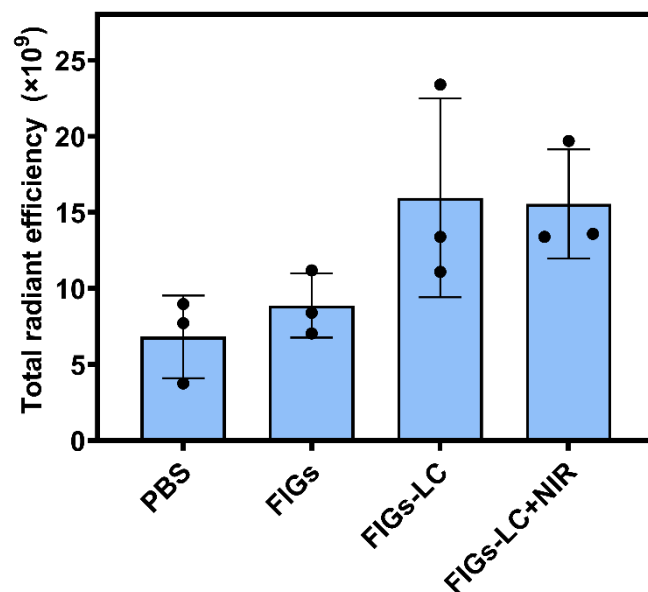

**Supplementary Figure 29.** The quantitative fluorescence data of ROS indicator DHE after co-injected with different solutions (PBS, FIGs, FIGs-LC) into tumor tissues and the NIR irradiation was conducted after 4 h, Ex=504 nm, Em=605 nm. Data represent mean  $\pm$  s.d. from three independent replicates.

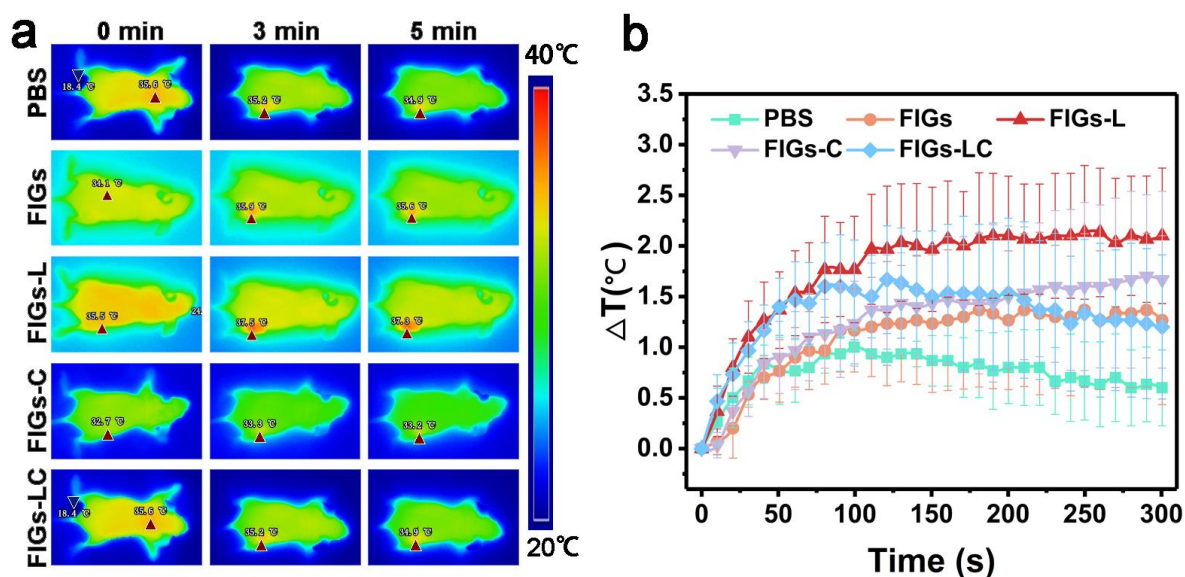

**Supplementary Figure 30.** (a) IR thermal images and (b) the corresponding heating curves of mice injected with PBS, FIGs, FIGs-L, FIGs-C, and FIGs-LC, irradiated with 808 nm laser (0.5 W), data represent mean  $\pm$  s.d. from three independent replicates.

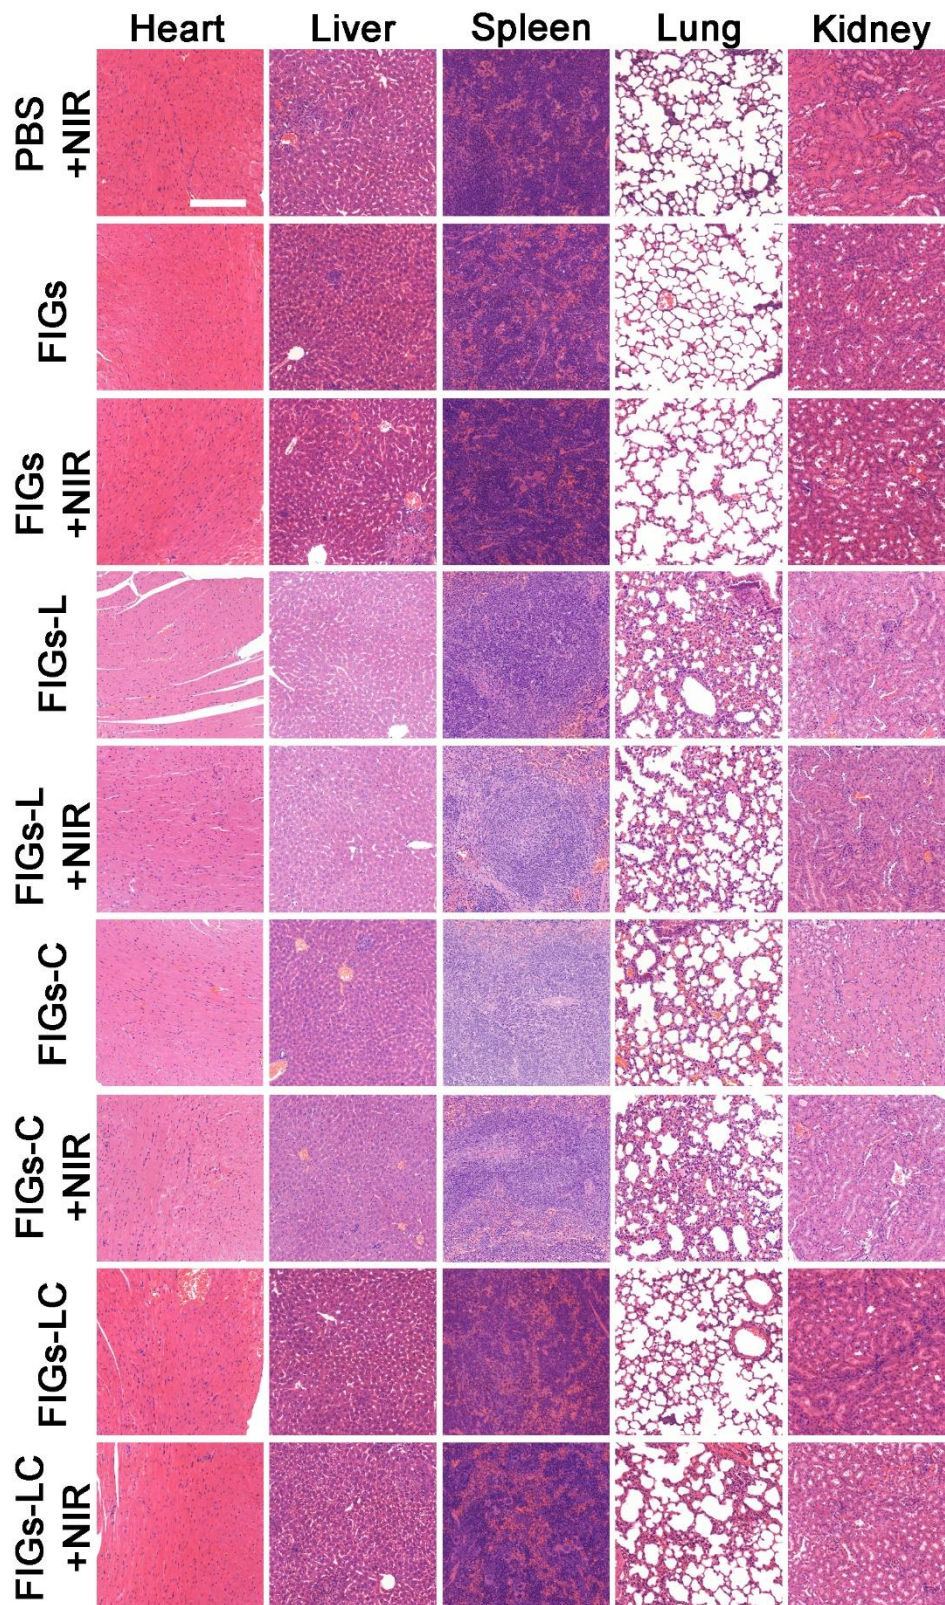

**Supplementary Figure 31.** H&E staining images of the major organs (heart, liver, spleen, lung, and kidney), scale bar: 200  $\mu\text{m}$ .

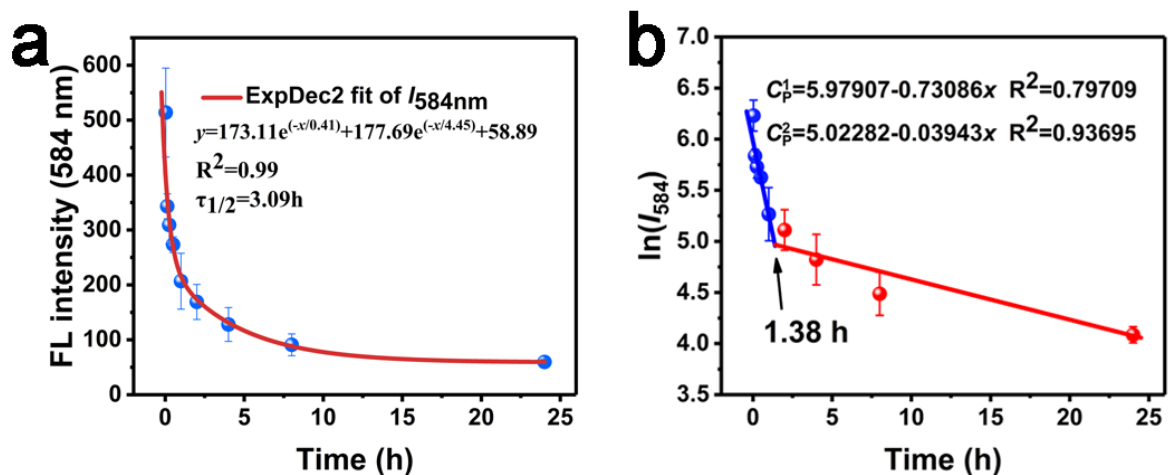

**Supplementary Figure 32.** (a) The blood circulation curve of intravenously injected FRGs-LC, based on the fluorescence intensity at 584 nm, the half-time ( $\tau_{1/2}$ ) was calculated to be 3.09 h. (b) The eliminating rate curves of intravenously injected FRGs-LC from the blood circulation curve based on the  $\ln(I_{584\text{nm}})$ -time relationship. The shifting interval of the two stages was calculated to be 1.38 h. Error bars = Standard Deviation ( $n=3$ ).

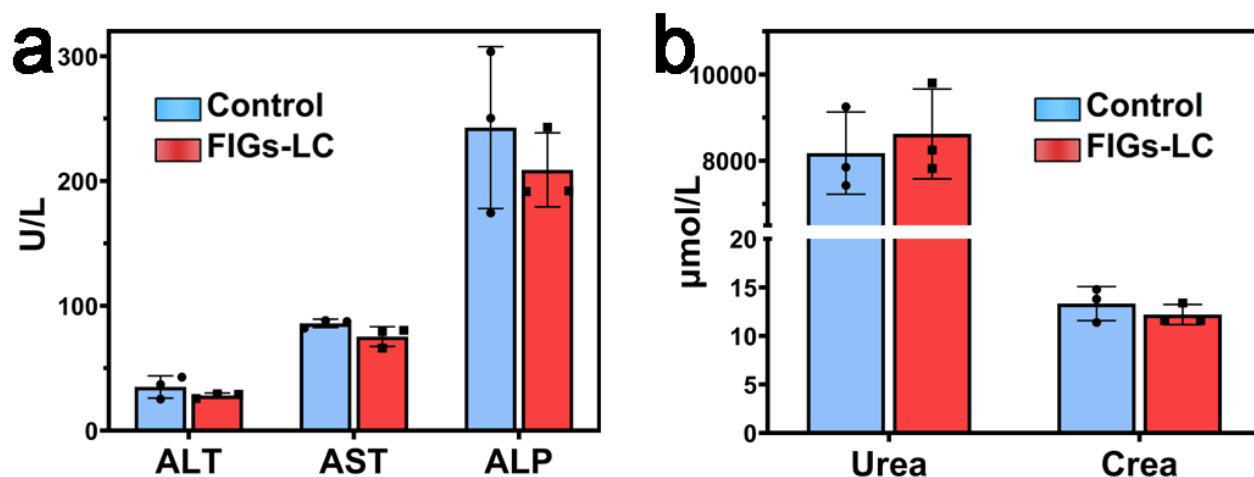

**Supplementary Figure 33.** (a) Blood biochemistry assays of liver function markers: alanine aminotransferase (ALT), aspartate aminotransferase (AST), alkaline phosphatase (ALP) in mice. (b) Blood biochemistry assays of kidney function markers: Urea and creatinine (Crea). Data represent mean  $\pm$  s.d. from three independent replicates.

**Supplementary Table 1.** The loading efficiency and loading amount of LOx and CAT.

| Enzyme | FIGs  | Added enzyme | Residual (4 mL) | Loading | Loading efficiency | Loading amount |
|--------|-------|--------------|-----------------|---------|--------------------|----------------|
| LOx    | 10 mg | 20.5 U       | 4.96 U/mL       | 19.86 U | 96.88 %            | 1.99 U/mg      |
| CAT    | 10 mg | 41.0 U       | 8.70 U/mL       | 34.78 U | 84.83 %            | 3.48 U/mg      |

**Supplementary Table 2.** Hematology analysis of mice with FIGs-LC administration ( $n=3$ )

| Test (units)        | Control (mean $\pm$ SD) | FIGs-LC (mean $\pm$ SD) |
|---------------------|-------------------------|-------------------------|
| WBC ( $10^9/L$ )    | 5.92 $\pm$ 2.29         | 9.90 $\pm$ 1.03         |
| RBC ( $10^{12}/L$ ) | 8.83 $\pm$ 0.22         | 8.73 $\pm$ 0.22         |
| HGB (g/L)           | 140.33 $\pm$ 3.68       | 143.67 $\pm$ 0.94       |
| HCT (%)             | 41.37 $\pm$ 2.73        | 44.40 $\pm$ 0.80        |
| MCV (fL)            | 46.80 $\pm$ 2.82        | 50.83 $\pm$ 0.50        |
| MCH (pg)            | 15.90 $\pm$ 0.22        | 16.43 $\pm$ 0.31        |
| MCHC (g/L)          | 340.33 $\pm$ 15.15      | 323.67 $\pm$ 3.68       |
| PLT ( $10^9/L$ )    | 890.00 $\pm$ 421.91     | 1241.33 $\pm$ 188.24    |
| RDW-SD (fL)         | 37.37 $\pm$ 0.62        | 36.17 $\pm$ 1.64        |
| RDW-CV (%)          | 24.10 $\pm$ 1.23        | 21.77 $\pm$ 1.02        |
| PDW (fL)            | 9.20 $\pm$ 0.46         | 8.43 $\pm$ 0.31         |
| MPV (fL)            | 7.90 $\pm$ 0.30         | 7.67 $\pm$ 0.12         |
| P-LCR (%)           | 12.10 $\pm$ 1.15        | 10.30 $\pm$ 0.86        |
| PCT (%)             | 1.15 $\pm$ 0.22         | 0.95 $\pm$ 0.14         |
| NEUT# ( $10^9/L$ )  | 2.46 $\pm$ 1.28         | 2.42 $\pm$ 0.87         |
| LYMPH# ( $10^9/L$ ) | 3.30 $\pm$ 0.99         | 7.22 $\pm$ 0.17         |
| MONO# ( $10^9/L$ )  | 0.01 $\pm$ 0.01         | 0.01 $\pm$ 0.01         |
| EO# ( $10^9/L$ )    | 0.14 $\pm$ 0.07         | 0.24 $\pm$ 0.05         |
| BASO# ( $10^7/L$ )  | 0.33 $\pm$ 0.47         | 0.33 $\pm$ 0.47         |
| NEUT% (%)           | 39.93 $\pm$ 5.85        | 23.87 $\pm$ 5.83        |
| LYMPH% (%)          | 57.57 $\pm$ 6.07        | 73.53 $\pm$ 5.80        |
| MONO% (%)           | 0.23 $\pm$ 0.21         | 0.10 $\pm$ 0.08         |
| EO% (%)             | 2.20 $\pm$ 0.37         | 2.47 $\pm$ 0.62         |
| BASO% (%)           | 0.07 $\pm$ 0.09         | 0.03 $\pm$ 0.05         |
